# Supplementary material
Source: ML conference proceedings conference paper supplement (https://proceedings.mlr.press/v189/verine23a.html)
Supplement: Supplementary file [file verine23a-supp.pdf]

## Appendix: On the expressivity of bi-Lipschitz normalizing flows

**Alexandre Verine**

ALEXANDRE.VERINE@DAUPHINE.PSL.EU

**Benjamin Negrevertgne**

BENJAMIN.NEGREVERTGNE@DAUPHINE.PSL.EU

**Yann Chevaleyre**

YANN.CHEVALEYRE@DAUPHINE.PSL.EU

*LAMSADE, Université Paris-Dauphine, PSL, Paris, France*

**Fabrice Rossi**

ROSSI@CEREMADE.DAUPHINE.FR

*CEREMADE, Université Paris-Dauphine, PSL, Paris, France*

**Editors:** Emtiyaz Khan and Mehmet Gönen

### Appendix A. Proofs

#### A.1. Proof of theorem 6

By definition we have  $\widehat{P}(A) = \int_A \widehat{p}(\mathbf{x}) d\mathbf{x}$ , then with the change of variable formula we obtain :

$$\begin{aligned} \widehat{P}(A) &= \int_A |\text{Jac}_F(\mathbf{x})| q(F(\mathbf{x})) d\mathbf{x} \\ &= \frac{1}{(2\pi)^{d/2}} \int_A |\text{Jac}_F(\mathbf{x})| e^{-\|F(\mathbf{x})\|_2^2/2} d\mathbf{x} \end{aligned}$$

As  $F$  is  $L_1$ -Lipschitz we have  $|\text{Jac}_F(\mathbf{x})| \leq L_1^d$ , then

$$\begin{aligned} \widehat{P}(A) &\leq \left(\frac{L_1}{\sqrt{2\pi}}\right)^d \int_A e^{-\|F(\mathbf{x})\|_2^2/2} d\mathbf{x} \\ &\leq \left(\frac{L_1}{\sqrt{2\pi}}\right)^d \int_A d\mathbf{x} \\ &\leq \left(\frac{L_1}{\sqrt{2\pi}}\right)^d \text{vol}(A), \end{aligned}$$

and thus  $TV(P^*, \widehat{P}) = \sup_A |P^*(A) - \widehat{P}(A)|$  implies

$$TV(P^*, \widehat{P}) \geq \sup_A \left( P^*(A) - \left(\frac{L_1}{\sqrt{2\pi}}\right)^d \text{vol}(A) \right)$$

#### A.2. Proof of theorem 7

By definition of the TV distance, we have

$$\mathcal{D}_{\text{TV}}(P^*, \widehat{P}) \geq \sup_{R, \mathbf{x}_0} |P^*(B_{R, \mathbf{x}_0}) - Q(F(B_{R, \mathbf{x}_0}))|,$$

where  $B_{R,\mathbf{x}_0}$  is the ball of a radius  $R$  centered in  $\mathbf{x}_0$ .

Then, the idea is to show that the image of a ball  $B_R$  by a  $L_1$ -Lipschitz function is in a ball of radius  $L_1R$ , and then use a reverse isoperimetric inequality to find an upper bound of the measure of a ball of a radius  $L_1R$ .

**Proof of  $F(B_{R,\mathbf{x}_0}) \subset B_{L_1R,F(\mathbf{x}_0)}$**

First of all, for every  $\mathbf{z} \in F(B_{R,\mathbf{x}_0})$ , there exist  $\mathbf{x} \in B_R$  such that  $F^{-1}(\mathbf{z}) = \mathbf{x}$ , we have :

$$\begin{aligned} \|F(F^{-1}(\mathbf{z})) - F(\mathbf{x}_0)\| &= \|F(\mathbf{x}) - F(\mathbf{x}_0)\| \\ &\leq L_1\|\mathbf{x} - \mathbf{x}_0\| \\ &\leq L_1R \end{aligned}$$

**Upper bound of  $Q(B_{L_1R})$**  This bound is extracted from the work of Ball (1993) on the Reverse Isoperimetric Inequality. First of all, it can be easily establish that  $Q(B_{L_1R}(F(\mathbf{x}_0)))$  is at a maximum when  $F(\mathbf{x}_0) = 0$ . From now on, we will only consider  $B_{L_1R}$  the ball centered on 0. Therefore the objective is to find an upper bound on :

$$\begin{aligned} Q(B_{L_1R}) &= \int_{\|\mathbf{z}\| < L_1R} q(\mathbf{z}) d\mathbf{z} \\ &= \int_{\|\mathbf{z}\| < L_1R} \frac{1}{(\sqrt{2\pi})^d} e^{-\|\mathbf{z}\|^2/2} d\mathbf{z} \end{aligned}$$

We can use the polar coordinates system to get another expression of the Gaussian measure with  $S_{d-1}(r) = \frac{2\pi^{d/2}r^{d-1}}{\Gamma(d/2)}$  being the volume of the hypersphere :

$$\begin{aligned} Q(B_{L_1R}) &= \frac{1}{(2\pi)^{d/2}} \int_0^{L_1R} S_{d-1}(r) e^{-r^2/2} dr \\ &= \frac{2}{2^{d/2}\Gamma(d/2)} \int_0^{L_1R} r^{d-1} e^{-r^2/2} dr \end{aligned}$$

However  $r^{d-1}e^{-r^2/2}$  has a maximum value reached for  $r = \sqrt{d-1}$ , we can have an upper bound :

$$\begin{aligned} Q(B_{L_1R}) &\leq \frac{2}{2^{d/2}\Gamma(d/2)} \sqrt{d-1}^{d-1} e^{-\frac{d-1}{2}} \int_0^{L_1R} dr \\ &\leq \frac{\sqrt{2}L_1R}{\Gamma(d/2)} \left(\frac{d-1}{2e}\right)^{\frac{d-1}{2}} \end{aligned}$$

Then, with the Stirling approximation of the Gamma function:

$$\begin{aligned} \frac{1}{2}\Gamma(d/2) &= \frac{1}{d}\Gamma(d/2 + 1) \\ &\geq \frac{\sqrt{\pi}\sqrt{d}}{d} (d/2)^{d/2} e^{-d/2} \\ &\geq \frac{\sqrt{\pi}}{2^{d/2}} d^{\frac{d-1}{2}} e^{-\frac{d}{2}} \end{aligned}$$

We obtain:

$$\begin{aligned} Q(B_{L_1R}) &\leq \frac{2}{2^{d/2}\Gamma(d/2)} (d-1)^{\frac{d-1}{2}} e^{-\frac{d-1}{2}} \\ &\leq \frac{L_1R\sqrt{e}}{\sqrt{\pi}} \left(\frac{d-1}{d}\right)^{\frac{d-1}{2}} \end{aligned}$$

Using the bound

$$\frac{1}{\sqrt{e}} < \left(\frac{d-1}{d}\right)^{\frac{d-1}{2}},$$

we have

$$Q(B_{L_1 R}) < \frac{L_1 R}{\sqrt{\pi}}$$

**Lower Bound of the TV** As soon as we have an upper bound on  $Q(B_{L_1 R})$ , we have :

$$\begin{aligned} \mathcal{D}_{\text{TV}}(P^*, \widehat{P}) &\geq \sup_{R, \mathbf{x}_0} (P^*(B_{R, \mathbf{x}_0}) - Q(F(B_{R, \mathbf{x}_0}))) \\ &\geq \sup_{R, \mathbf{x}_0} (P^*(B_{R, \mathbf{x}_0}) - Q(B_{L_1 R, \mathbf{x}_0})) \\ &\geq \sup_{R, \mathbf{x}_0} \left( P^*(B_{R, \mathbf{x}_0}) - \frac{L_1 R}{\sqrt{\pi}} \right) \end{aligned}$$

### A.3. Proof of Theorem 8

**Value of  $Q(B_{R,0})$**  By construction

$$Q(B_{R,0}) = \mathbb{P}(\|\mathbf{z}\|^2 \leq R^2),$$

when  $\mathbf{z}$  follows the standard Gaussian distribution in  $\mathbb{R}^d$ . This quantity can be computed using the cumulative distribution function of the chi-square distribution, i.e.

$$Q(B_{R,0}) = \frac{\gamma\left(\frac{d}{2}, \frac{R^2}{2}\right)}{\Gamma\left(\frac{d}{2}\right)},$$

where  $\gamma$  is the lower incomplete gamma function given by

$$\gamma(x, k) = \int_0^x t^{k-1} e^{-t} dt.$$

**Lower Bound of the TV** Since we have the closed form of the measure over a ball we can write :

$$\begin{aligned} \mathcal{D}_{\text{TV}}(P^*, \widehat{P}) &\geq \sup_{R, \mathbf{x}_0} (P^*(B_{R, \mathbf{x}_0}) - Q(F(B_{R, \mathbf{x}_0}))) \\ &\geq \sup_{R, \mathbf{x}_0} (P^*(B_{R, \mathbf{x}_0}) - Q(B_{L_1 R, \mathbf{x}_0})) \\ &\geq \sup_{R, \mathbf{x}_0} \left( P^*(B_{R, \mathbf{x}_0}) - \frac{\gamma\left(\frac{d}{2}, \frac{L_1^2 R^2}{2}\right)}{\Gamma\left(\frac{d}{2}\right)} \right) \end{aligned}$$

### A.4. Proof of theorem 9

In this section, we denote  $B_R = B_{R, F^{-1}(0)}$ . As  $F^{-1}$  is  $L_2$ -Lipschitz,  $F^{-1}(B_{R/L_2, 0}) \subset B_R$  and thus

$$\widehat{P}(B_R) \geq \widehat{P}(F^{-1}(B_R)) = Q(B_{R/L_2, 0}).$$

Therefore, by analogy with the proof of Theorem 8:

$$\begin{aligned}
 \mathcal{D}_{\text{TV}}(P^*, \widehat{P}) &\geq \sup_R (Q(F(B_R)) - P^*(B_R)) \\
 &\geq \sup_R (Q(B_{R/L_2}) - P^*(B_R)) \\
 &\geq \sup_R \left( \frac{\gamma\left(\frac{d}{2}, \frac{R^2}{2L_2^2}\right)}{\Gamma\left(\frac{d}{2}\right)} - P^*(B_R) \right)
 \end{aligned}$$

### A.5. Proof of Corollary 10

Since  $M_1$  and  $M_2$  are separated by a distance  $D$  the ball centered on  $F^{-1}(0)$  has a radius at least as big as  $D$  that we might call  $B_D$  to simplify the notation. Therefore :

$$\begin{aligned}
 \bar{\alpha} &= \widehat{P}(M_1) + \widehat{P}(M_2) \\
 &= 1 - \widehat{P}(\overline{M_2} \cup M_1) \\
 &\leq 1 - \widehat{P}(B_D) \\
 &\leq 1 - Q(F(B_D)) \\
 &\leq 1 - Q(B_{D/L_2}) \\
 &\leq 1 - \frac{\gamma\left(\frac{d}{2}, \frac{D^2}{2L_2^2}\right)}{\Gamma\left(\frac{d}{2}\right)}
 \end{aligned}$$

And since  $P^*(B_D) = 0$  :

$$\begin{aligned}
 \mathcal{D}_{\text{TV}}(P^*, \widehat{P}) &\geq |\widehat{P}(B_D) - P^*(B_D)| \\
 &\geq \widehat{P}(B_D(F^{-1}(0))) \\
 &\geq \frac{\gamma\left(\frac{d}{2}, \frac{D^2}{2L_2^2}\right)}{\Gamma\left(\frac{d}{2}\right)}
 \end{aligned}$$

### A.6. Bounds for learned variance

For a given variance  $\sigma^2$  and the corresponding covariance matrix  $\sigma^2 I$ , the Gaussian measure of a ball  $Q_\sigma(B_R)$  of radius  $R$  associated can be written as :

$$\begin{aligned}
 Q_\sigma(B_R) &= \int_{\|z\| < L_1 R} q_\sigma(z) dz \\
 &= \int_{\|z\| < R} \frac{1}{(\sqrt{2\pi})^d \sigma^d} e^{-\|z\|^2/2\sigma^2} dz
 \end{aligned}$$

Then, with the proper change of variable  $z' = z/\sigma$ , we have :

$$\begin{aligned}
 Q_\sigma(B_R) &= \int_{\|\sigma z'\| < R} \frac{1}{(\sqrt{2\pi})^d \sigma^d} e^{-\|z\|^2/2} |\sigma I| dz' \\
 &= \int_{\|z\| < \frac{R}{\sigma}} \frac{1}{(\sqrt{2\pi})^d} e^{-\|z\|^2/2} dz \\
 &= Q(B_{R/\sigma})
 \end{aligned}$$

Hence the two bounds become :

$$\mathcal{D}_{\text{TV}}(P^*, \widehat{P}) \geq \sup_{R, x_0} \left( P^*(B_{R, x_0}) - \frac{\gamma\left(\frac{d}{2}, \frac{L_1^2 R^2}{2\sigma^2}\right)}{\Gamma\left(\frac{d}{2}\right)} \right),$$

and

$$\mathcal{D}_{\text{TV}}(P^*, \hat{P}) \geq \sup_R \left( \frac{\gamma(\frac{d}{2}, \frac{\sigma^2 R^2}{2L_2^2})}{\Gamma(\frac{d}{2})} - P^*(B_{R, F^{-1}(0)}) \right).$$

## Appendix B. 2D datasets

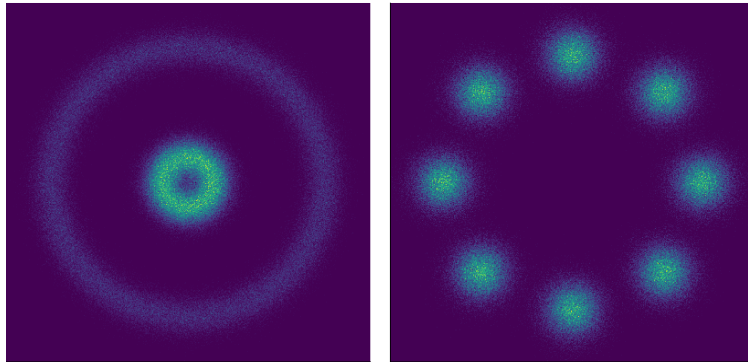

Figure B.1: 2D Dataset : *Circles* (left) and *8 Gaussians* (right).

## Appendix C. Inverse image of the center of the Gaussian latent distribution

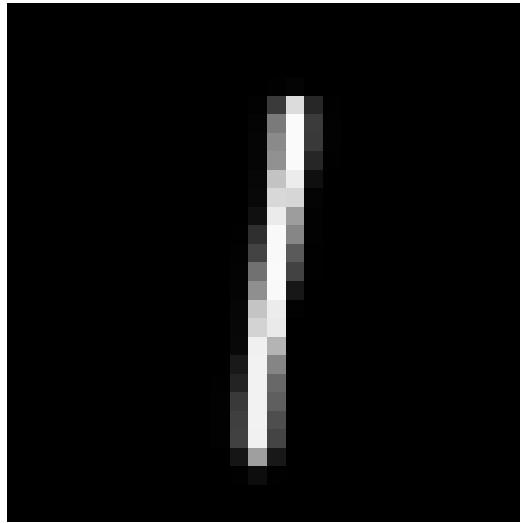

Figure C.2: Image of  $F^{-1}(0)$  for *MNIST* of the Residual Flow of [Chen et al. \(2020\)](#)

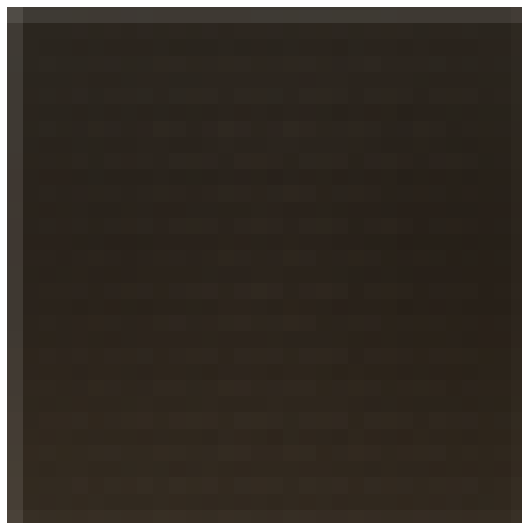

Figure C.3: Image of  $F^{-1}(0)$  for *CIFAR10* of the Residual Flow of [Chen et al. \(2020\)](#)
